# Supplementary material
Source: ML conference proceedings conference paper supplement (https://openaccess.thecvf.com/content/CVPR2021/html/Fernando_Anticipating_Human_Actions_CVPR_2021_paper.html)
Supplement: Supplementary file 1 [file Fernando_Anticipating_Human_Actions_CVPR_2021_supplemental.pdf]

# Anticipating human actions by correlating past with the future with Jaccard similarity measures : supplementary material

Basura Fernando  
IHPC, A\*STAR, Singapore.

Samitha Herath  
Dept of Data Science & AI, Monash University

## 1. How verb, noun models are fused with action model?

We train three separate models, one for noun prediction ( $y_n = f_n(X)$ ), one for verb prediction ( $y_v = f_v(X)$ ) and another one for action prediction ( $y_a = f_a(X)$ ). Let us say, the  $i^{\text{th}}$  action  $y_a^i$  is a composition of  $k^{\text{th}}$  noun ( $y_n^k$ ) and  $j^{\text{th}}$  verb ( $y_v^j$ ). Therefore, at test time, the action score for  $y_a^i$  is obtained from composition of noun and verb prediction scores by multiplying them  $y_n^k \times y_v^j$  and the score prediction obtained from  $f_a(X)$ . Therefore, the final score is given by the following

$$y_a^i + y_n^k \times y_v^j \quad (1)$$

where each action  $a^i$  is a composition of noun  $n^k$  and verb  $v^j$ .

## 2. Architecture for action anticipation using Fisher Vectors

Fisher vector sequence has 64 dimensional features. Let use denote the observed video feature sequence by  $V_{obs}$  which contains features from  $t = t_{obs}$  seconds and ends at  $t = t_{obs} + T$  seconds. We denote the future sequence by  $V_f$  which starts at  $t = t_{obs} + T + \delta_t$  and ends at  $t = t_{obs} + T + \delta_t + T$  where  $T$  is typically 2. We use  $\delta_t$  of one. The feature summarizing architecture for Fisher vectors are shown in figure 1.

## 3. More ablation on Jaccard losses.

We raise the concern about cosine similarity due to two reasons. First, it is not a smooth loss. Secondly, it overly rely on the angle between two vectors and not so much on the magnitude. However, L2 distance considers both the magnitude and the angle between vectors. However, it is not bounded. Can a combination of L2 and cosine similarity perform better than Jaccard Vector Similarity? We answer this question here. We report results in Table 1.

## 4. Ablation on action anticipation architecture.

The full model used for action anticipation is presented in the Equation 6 of the main paper. For ease of reference

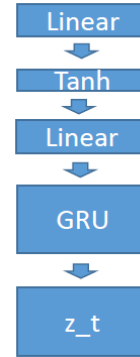

Figure 1. Feature summarizing network for Fisher vectors on Breakfast dataset.

| Method          | JHMDB       | JHMDB       | UCF101      |
|-----------------|-------------|-------------|-------------|
| Observation (%) | 10          | 20          | 20          |
| L2 loss         | 50.4        | 51.5        | 67.5        |
| Cosine loss     | 51.8        | 54.5        | 66.9        |
| L2 + Cosine     | 56.6        | 63.1        | 70.1        |
| JVS             | <b>62.6</b> | <b>64.7</b> | <b>72.3</b> |

Table 1. Results on early action prediction to show the the impact of JVS loss.

we state the model equation here as well.

$$\beta[L_{CE}(y_o, \hat{y}_o) + L_{CE}(y_f, \hat{y}_{of})] + L_{CE}(y_f, \hat{y}_f) + \lambda \exp(-\phi(\mathbf{z}_h, \mathbf{z})) \quad (2)$$

Now we add a new term  $\beta$  to in equation 5 for observation branch to evaluate the impact of it. Additional result in shown Table 2. When we set  $\beta = 0$  and  $\lambda = 1$  we see that the observed branch ( $\beta$ ) helps when  $\lambda = 1$  and does not not help when  $\lambda = 0$ .

Our baseline model contains on the future loss and therefore the overall loss of the baseline model is given by

$$L_{CE}(y_f, \hat{y}_f) \quad (3)$$

When we set the  $\lambda$  term to zero the model reduces to the following loss

$$L_{CE}(y_o, \hat{y}_o) + L_{CE}(y_f, \hat{y}_{of}) + L_{CE}(y_f, \hat{y}_f) \quad (4)$$

| Dataset                           | Breakfast |            | Epic-Kitchen |       |
|-----------------------------------|-----------|------------|--------------|-------|
| Modality                          | FV        | (R(2D+1D)) | (R(2D+1D))   |       |
| Measure                           | Accuracy  |            | Top 1        | Top 5 |
| $\lambda = 0.0$ and $\beta = 0.0$ | 23.4      | 24.3       | 9.82         | 24.48 |
| $\lambda = 0.0$ and $\beta = 1.0$ | 23.9      | 24.6       | 10.01        | 24.82 |
| $\lambda = 1.0$ and $\beta = 0.0$ | 27.6      | 27.1       | 14.25        | 30.46 |
| $\lambda = 1.0$ and $\beta = 1.0$ | 28.6      | 28.0       | 15.20        | 32.54 |

Table 2. The impact of components of our model on action anticipation on Breakfast and Epic-Kitchen55 datasets.

| Dataset                   | Breakfast |            | Epic-Kitchen |       |
|---------------------------|-----------|------------|--------------|-------|
| Modality                  | FV        | (R(2D+1D)) | (R(2D+1D))   |       |
| Measure                   | Accuracy  |            | Top 1        | Top 5 |
| Baseline                  | 23.4      | 24.3       | 9.82         | 24.48 |
| Eq. 6 ( $\lambda = 0.0$ ) | 23.9      | 24.6       | 10.01        | 24.82 |
| JVS                       | 28.6      | 28.0       | 15.20        | 32.54 |
| JCC                       | 28.6      | 28.1       | 14.12        | 32.16 |
| JFIP                      | 30.3      | 30.9       | 13.89        | 33.31 |

Table 3. The impact of  $\lambda \exp(-\phi(\mathbf{z}_h, \mathbf{z}))$  on action anticipation on Breakfast and Epic-Kitchen55 datasets.

| Predictor | Noun  |       | Verb  |       |
|-----------|-------|-------|-------|-------|
|           | Top 1 | Top 5 | Top 1 | Top 5 |
| JVS       | 26.37 | 45.75 | 41.34 | 78.05 |
| JCC       | 26.25 | 45.94 | 41.72 | 78.33 |
| JFIP      | 23.94 | 45.30 | 39.99 | 78.08 |
| ALL       | 27.27 | 49.97 | 43.55 | 79.10 |

Table 4. Verb and noun anticipation results on Epic Kitchen55 validation set.

We evaluate the impact of these models in Table 3.

$$\beta[L(y_o, \hat{y}_o) + L(y_f, \hat{y}_{of})] + L(y_f, \hat{y}_f) + \lambda \exp(-\phi(\mathbf{z}_h, \mathbf{z})) \quad (5)$$

It is interesting to see that model with  $\lambda = 0.0$  performs only slightly better than the baseline model. Once, we incorporate the term  $\lambda \exp(-\phi(\mathbf{z}_h, \mathbf{z}))$ , the results improve significantly for all datasets and features.

## 5. Noun and verb anticipation accuracy

In this section we evaluate the noun and verb anticipation performance on Epic Kitchen55 dataset. We use rgb, optical flow and object streams to train our model. As before we use Resnet18(2D+1D) network pre-trained on Kinetics dataset for action recognition. Then we fine-tune these models using our anticipation architecture and loss functions. Results are shown in Table 4.
